# Supplementary material for: Cell-penetrating peptides TAT and 8R functionalize P22 virus-like particles to enhance tissue distribution and retention in vivo
Source: Frontiers journal article supplement (doi:10.3389/fvets.2024.1460973), 2024-09-03
Supplement: Image_1.pdf [file Image_1.pdf]

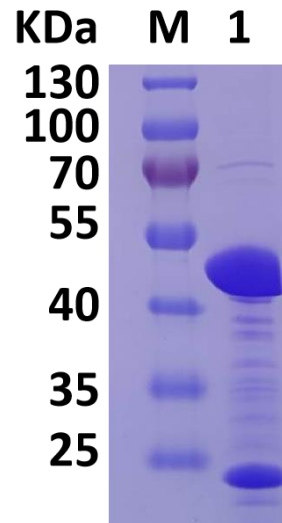

**Figure S1. Characterization of the expression of P22 VLP by SDS–PAGE.** M: protein marker; lines 1: with 0.1 mM IPTG induction of the indicated P22 VLP.

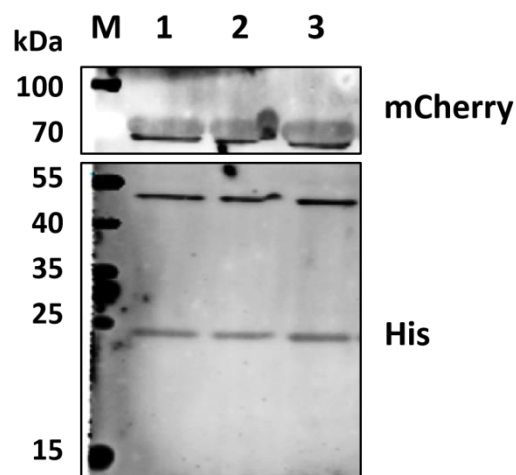

**Figure S2 Identification of three mCherry-conjugated P22 VLPs components by Western blot (WB).** M: protein marker; line 1-3: purified P22 VLP-mCherry, P22 VLP-mCherry-TAT, and P22 VLP-mCherry-8R. The 75 kDa band corresponded to the mCherry-modified coat protein (CP), while the unmodified CP and SP were observed at 50 kDa and 22.5 kDa, respectively.
